# Supplementary material for: Child-Pugh B or C Cirrhosis Increases the Risk for Bleeding Following Colonoscopic Polypectomy
Source: PubMed Central journal article supplement — Gut Liver. 2019 Dec 11;14(6):755–64. doi: 10.5009/gnl19131 (PMC7667933; doi:10.5009/gnl19131), 2019-12-11
Supplement: GNL-14-755_Supple.pdf [file GNL-14-755_Supple.pdf]

**Supplementary Table 1.** Baseline Characteristics of the Study Population with A Platelet Count less than 50,000/ $\mu$ L

| Baseline characteristics       | Value (n=50)      |
|--------------------------------|-------------------|
| Age, yr                        | 58.7 $\pm$ 9.0    |
| Male sex                       | 36 (72.0)         |
| Serum albumin, g/dL            | 3.73 $\pm$ 0.50   |
| Serum total bilirubin, mg/dL   | 2.23 $\pm$ 1.77   |
| Prothrombin time, INR          | 1.265 $\pm$ 0.120 |
| PLT count, $\times 10^3/\mu$ L | 40.6 $\pm$ 5.9    |
| CP score                       | 6.2 $\pm$ 1.1     |
| Cause of CLD                   |                   |
| HBV                            | 33 (66.0)         |
| HCV                            | 11 (22.0)         |
| Alcoholic                      | 1 (2.0)           |
| NAFLD                          | 1 (2.0)           |
| Autoimmune                     | 2 (4.0)           |
| Cryptogenic                    | 2 (4.0)           |
| Polyp no.                      | 2.1 $\pm$ 1.6     |
| Polyp size, mm                 | 6.3 $\pm$ 5.0     |
| Polyp $\geq$ 10 mm             | 10 (20.0)         |
| Method of polypectomy          |                   |
| CFP                            | 24 (48.0)         |
| EMR or ESD                     | 26 (52.0)         |
| Location of polyp              |                   |
| Proximal                       | 21 (42.0)         |
| Distal                         | 15 (30.0)         |
| Mixed                          | 14 (28.0)         |
| Endoscopist                    |                   |
| Expert                         | 12 (24.0)         |
| Trainee                        | 38 (76.0)         |
| Underlying disease             |                   |
| DM                             | 13 (26.0)         |
| Hypertension                   | 8 (16.0)          |
| Dyslipidemia                   | 1 (2.0)           |
| CHD                            | 2 (4.0)           |
| CVD                            | 0                 |
| CKD                            | 0                 |
| Concomitant medication         |                   |
| Aspirin                        | 1 (2.0)           |
| Clopidogrel                    | 0                 |
| Cilostazol                     | 0                 |

Data are presented as mean $\pm$ SD or number (%).

INR, international normalized ratio; PLT, platelet; CP, Child-Pugh; CLD, chronic liver disease; HBV, hepatitis B virus; HCV, hepatitis C virus; NAFLD, nonalcoholic fatty liver disease; CFP, cold forceps polypectomy; EMR, endoscopic mucosal resection; ESD, endoscopic submucosal dissection; DM, diabetes mellitus; CHD, coronary heart disease; CVD, cerebrovascular disease; CKD, chronic kidney disease.
